# Supplementary material
Source: publisher site journal article supplement (https://www.dovepress.com/article/572465)
Supplement: Supplementary file 1 [file 572465_2026-1-16-Revised%20supplementary%20file.docx]

Supplementary Table 1. Primary Outcomes (HAMA-14 and HAMD-17): Longitudinal Analysis Using Generalized Estimating Equations (GEE)

| Outcome | Time Point | ​​Escitalopram group​​ Adjusted Mean (95% CI) | ​​Placebo group Adjusted Mean (95% CI) | ​​ Adjusted Mean Difference (95% CI) | *Pm* | *Pt* | *Pg* | *Pt+g* |
| --- | --- | --- | --- | --- | --- | --- | --- | --- |
| HAMA-14 score | Baseline | 23.28 (22.78 to 23.77) | 23.88 (23.46 to 24.29) | -0.60 (-1.25 to 0.05) | 0.071 | <0.001 | <0.001 | <0.001 |
|  | Month 1 | 14.03 (13.46 to 14.60) | 21.67 (21.26 to 22.09) | -7.64 (-8.35 to -6.93) | <0.001 |
|  | Month 6 | 17.71 (17.17 to 18.26) | 23.23 (22.79 to 23.68) | -5.52 (-6.23 to -4.81) | <0.001 |
|  | Month 12 | 18.53 (17.85 to 19.21) | 23.68 (23.13 to 24.23) | -5.15 (-6.03 to -4.27) | <0.001 |
|  | Δ (Month 1) | -9.25*​ (-9.67 to -8.82) | -2.20* (-2.46 to -1.95) | — | — | — | — | — |
|  | Δ (Month 12) | -4.75​* (-5.40 to -4.10) | -0.20 (-0.71 to 0.31) | — | — | — | — | — |
| HAMD-17 score | Baseline | 19.48 (19.08 to 19.88) | 19.57 (19.25 to 19.89) | -0.09 (-0.61 to 0.43) | 0.732 | <0.001 | <0.001 | <0.001 |
|  | Month 1 | 12.10 (11.66 to 12.55) | 18.20 (17.84 to 18.57) | -6.10 (-6.68 to -5.52) | <0.001 |
|  | Month 6 | 14.28 (13.85 to 14.70) | 19.10 (18.62 to 19.58) | -4.82 (-5.46 to -4.18) | <0.001 |
|  | Month 12 | 16.05 (15.66 to 16.45) | 20.08 (19.44 to 20.71) | -4.02 (-4.77 to -3.28) | <0.001 |
|  | Δ (Month 1) | -7.37*(-7.74 to -7.01) | -1.37* (-1.72 to -1.01) | — | — | — | — | — |
|  | Δ (Month 12) | -3.43*(-3.99 to -2.86) | 0.51 (-0.12 to 1.14) | — | — | — | — | — |

GEE, generalized estimating equations. CI, confidence interval.

The adjusted mean difference is calculated as Escitalopram minus Placebo.

Δ (Month 1): Month 1 – Baseline within-group difference, calculated as Month 1 value minus Baseline value.

Δ (Month 12): Month 12 – Baseline within-group difference, calculated as Month12 value minus Baseline value.

​​​Significance​​: **p* <0.01 (two-tailed, within-group changes).

*Pm*: Comparisons of the mean differences were made at all time points from the final adjusted generalized estimating equations model*. Pt*: The overall change over time. *Pg*: The average group difference. *Pt+g*: The interaction between time and group*.*

Supplementary Table 2. Adjusted Treatment Effects at the Primary Endpoint: Analysis of Covariance (ANCOVA)

| Outcome | Escitalopram Adjusted Mean (95% CI) | Placebo Adjusted Mean (95% CI) | Adjusted Mean Difference (95% CI) | *Pg* | Partial η² |
| --- | --- | --- | --- | --- | --- |
| n | 73 | 73 | — | *—* | — |
| HAMA-14 score | 14.30 (13.94 to 14.65) | 21.43 (21.07 to 21.78) | -7.13 (-7.64 to -6.62) | < 0.001 | 0.038 |
| HAMD-17 score | 12.10 (11.76 to 12.45) | 18.18 (17.83 to 18.53) | -6.08 (-6.57 to -5.58) | < 0.001 | 0.063 |

ANCOVA, analysis of covariance. The adjusted mean difference is calculated as Escitalopram minus Placebo.

*Pg*: The average group difference.

Supplementary Table 3. Secondary Outcomes (CAT, mMRC, FEV₁%pred): Longitudinal Analysis Using Generalized Estimating Equations (GEE)

| Outcome | Time Point | ​​Escitalopram group​​ Adjusted Mean (95% CI) | ​​Placebo group Adjusted Mean (95% CI) | ​​ Adjusted Mean Difference (95% CI) | *Pm* | *Pt* | *Pg* | *Pt+g* |
| --- | --- | --- | --- | --- | --- | --- | --- | --- |
| ​​CAT score​​ | Baseline | 19.50 (18.54 to 20.46) | 19.01 (17.93 to 20.08) | 0.49 (-0.95 to 1.93) | 0.503 | <0.001 | 0.209 | <0.001 |
|  | Month 1 | 16.72 (15.84 to 17.60) | 16.80 (15.71 to 17.89) | -0.08 (-1.48to 1.31) | 0.907 |
|  | Month 6 | 15.39 (14.63 to 16.14) | 16.24 (15.18 to 17.29) | -0.85 (-2.15 to 0.44) | 0.198 |
|  | Month 12 | 13.30 (12.68 to 13.91) | 16.22 (15.19 to 17.25) | -2.93 (-4.13 to -1.73) | <0.001 |
|  | Δ (Month 1) | -2.78**​ (-3.01 to -2.55) | -2.21** (-2.37 to -2.04) | — | — | — | — | — |
|  | Δ (Month 12) | -6.20** (-6.68 to -5.72) | -2.79​** (-3.02 to -2.55) | — | — | — | — | — |
| ​​mMRC score​​ | Baseline | 1.91 (1.78 to 2.05) | 1.92 (1.77 to 2.07) | -0.01 (-0.21 to 0.20) | 0.959 | <0.001 | 0.496 | 0.131 |
|  | Month 1 | 1.64 (1.52 to 1.76) | 1.54 (1.42 to 1.67) | 0.10 (-0.07 to 0.27) | 0.255 |
|  | Month 6 | 1.66 (1.53 to 1.79) | 1.55 (1.42 to 1.67) | 0.11 (-0.06 to 0.29) | 0.204 |
|  | Month 12 | 1.55 (1.43 to 1.67) | 1.53 (1.41 to 1.65) | 0.02 (-0.15 to 0.19) | 0.825 |
|  | Δ (Month 1) | -0.27**​ (-0.37 to -0.17) | -0.38** (-0.49 to -0.27) | — | — | — | — | — |
|  | Δ (Month 12) | -0.36** (-0.50 to -0.23) | -0.39** (-0.50 to -0.28) | — | — | — | — | — |
| ​​FEV1% predicted​​ | Baseline | 53.89 (50.25 to 57.53) | 54.31 (51.00 to 57.62) | -0.42 (-5.33 to 4.50) | 0.869 | 0.013 | 0.862 | 0.497 |
|  | Month 1 | — | — | — | — |
|  | Month 6 | — | — | — | — |
|  | Month 12 | 57.59 (54.19 to 61.00) | 56.42 (52.98 to 59.86) | 1.18 (-3.67 to 6.02) | 0.634 |
|  | Δ (Month 12) | 3.70* (0.37 to 7.03) | 2.11 (-1.06 to 5.28) | — | — | — | — | — |

The adjusted mean difference is calculated as Escitalopram minus Placebo.

Δ (Month 1): Month 1 – Baseline within-group difference, calculated as Month 1 value minus Baseline value.

Δ (Month 12): Month 12 – Baseline within-group difference, calculated as Month12 value minus Baseline value.

Significance: *P<0.05, **P<0.01 (two-tailed, within-group changes).

Pm: Comparisons of the mean differences were made at all time points from the final adjusted generalized estimating equations model. Pt: The overall change over time. Pg: The average group difference. Pt+g: The interaction between time and group.

Missing data: FEV1% predicted at Month 1/6 not collected (—).

Supplementary Table 4. Key Interaction Effects from Generalized Estimating Equations (GEE) Models for Primary and Subgroup Analyses

| Analysis & Outcome | Effect Tested | Wald χ² | df | *p* value |
| --- | --- | --- | --- | --- |
| PRIMARY ANALYSIS (Total Cohort) | | | | |
| HAMA-14 score | Time × Group | 841.161 | 3 | < 0.001 |
| HAMD-17 score | Time × Group | 558.005 | 3 | < 0.001 |
| CAT score | Time × Group | 210.436 | 3 | <0 .001 |
| mMRC score | Time × Group | 5.627 | 3 | 0.131 |
| FEV₁% predicted | Time × Group | 0.461 | 1 | 0.497 |
| SUBGROUP ANALYSIS: Clinical setting | | | | |
| HAMA-14 score | Time × Group × Clinical setting | 4.999 | 3 | 0.172 |
|  | Group × Clinical setting | 4.041 | 1 | 0.044 |
| HAMD-17 score | Time × Group × Clinical setting | 4.243 | 3 | 0.236 |
|  | Group × Clinical setting | 0.043 | 1 | 0.835 |
| CAT score | Time × Group × Clinical setting | 2.366 | 3 | 0.500 |
|  | Group × Clinical setting | 7.588 | 1 | 0.006 |
| mMRC score | Time × Group × Clinical setting | 1.140 | 3 | 0.767 |
|  | Group × Setting | 0.550 | 1 | 0.458 |
| FEV₁% predicted | Time × Group × Clinical setting | 0.042 | 1 | 0.838 |
|  | Group × Clinical setting | 0.489 | 1 | 0.484 |

Df , degrees of freedom. Clinical setting (inpatient vs. outpatient). Analyses based on generalized estimating equations (GEE) with an AR1 correlation structure.

Supplementary Table 5. Subgroup Analysis of Treatment Efficacy by Clinical setting (GEE)

| Outcome | Clinical setting | Escitalopram Adjusted Mean (95% CI) | Placebo Adjusted Mean (95% CI) | Adjusted Mean Difference (95% CI) | *Pg* | *Ps+g* |
| --- | --- | --- | --- | --- | --- | --- |
| HAMA-14 score | inpatient | 17.95 (17.26 to 18.63) | 23.93 (22.86 to 25.00) | -5.98 (-7.24 to -4.72) | <0.001 | 0.044 |
| outpatient | 18.47 (17.92 to 19.03) | 22.96 (22.57 to 23.34) | -4.48 (-5.17 to -3.80) | <0.001 |
| HAMD-17 score | inpatient | 15.70(14.94 to 16.46) | 19.57(18.79 to 20.36) | -3.87(-4.97 to -2.77) | <0.001 | 0.835 |
| outpatient | 15.42(15.14 to 15.71) | 19.17(18.84 to 19.50) | -3.75(-4.18 to -3.31) | <0.001 |
| CAT score | inpatient | 16.31(14.44 to 18.18) | 13.71(12.06 to 15.35) | 2.60(0.07 to 5.14) | 0.044 | 0.006 |
| outpatient | 16.19(15.31 to 17.07) | 17.70(16.54 to 18.85) | -1.50(-2.94 to -0.07) | 0.040 |
| mMRC score | inpatient | 1.78(1.57 to 1.99) | 1.59(1.27 to 1.90) | 0.19(-0.19 to 0.57) | 0.326 | 0.458 |
| outpatient | 1.67(1.54 to 1.80) | 1.64(1.51 to 1.77) | 0.03(-0.16 to 0.22) | 0.759 |
| FEV1% predicted | inpatient | 52.78(44.94 to 60.62) | 56.63(45.92 to 67.35) | -3.85(-17.15 to 9.44) | 0.570 | 0.484 |
| outpatient | 56.24(52.85 to 59.64) | 55.07(52.26 to 57.89) | 1.71(-3.24 to 5.58) | 0.603 |

The adjusted mean difference is calculated as Escitalopram minus Placebo.

*Pg*: The average group difference. *Ps+g*: The interaction between Subgroup and group.
